# Supplementary material for: Participation of the Classical Speech Areas in Auditory Long-Term Memory
Source: PubMed Central journal article supplement (PMC4376917; doi:10.1371/journal.pone.0119472), 2015-03-27
Supplement: pone.0119472.s001.pdf [file pone.0119472.s001.pdf]

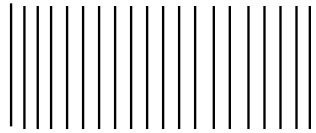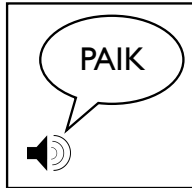

1000 ms

+

750 ms

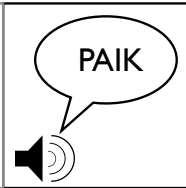

1000 ms

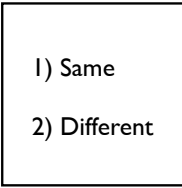

1) Same  
2) Different

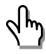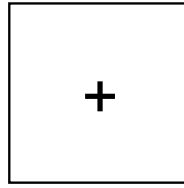

+

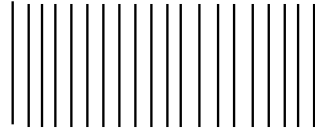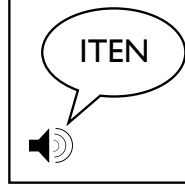

1000 ms

+

750 ms

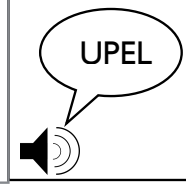

1000 ms

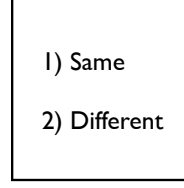

1) Same  
2) Different

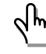

...

Perceptual
