# Supplementary material for: Participation of the Classical Speech Areas in Auditory Long-Term Memory
Source: PubMed Central journal article supplement (PMC4376917; doi:10.1371/journal.pone.0119472), 2015-03-27

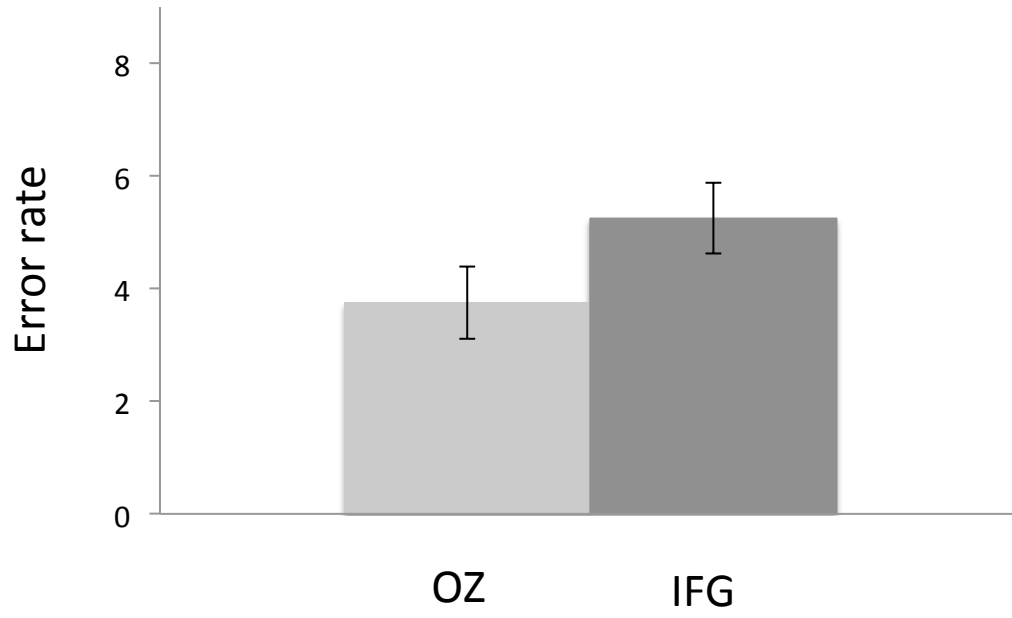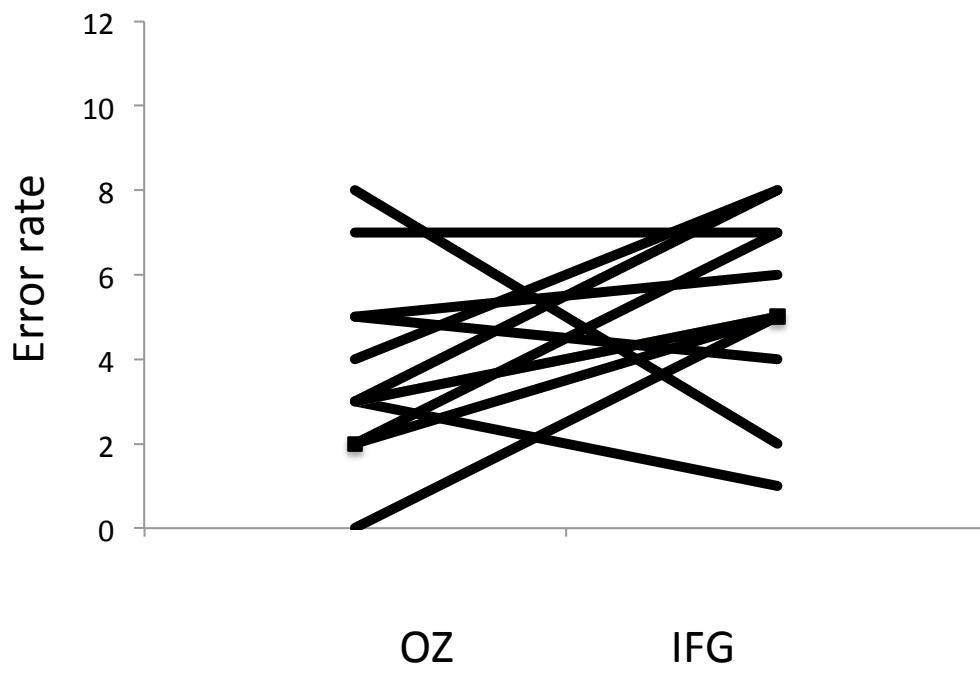

Supplement: pone.0119472.s002.pdf [file pone.0119472.s002.pdf]
